# Supplementary material
Source: MDPI journal article supplement (https://www.mdpi.com/search?q=biology-02-00419)
Supplement: s001 [file supporting file 1.xlsx]

## Sheet: Table S1
	Supporting Information: Taxa used for this analysis and description of the proposed supra-ordinal taxonomy.
	NOTE: full clade information is hidden in columns E-S
				Supra-ordinal clade membership (clades correspond to those in Figure 1, green indicates membership)
Species Number	Species name	NCBI Taxon Identifier	Common name	A	B	C	D	E	F	G	H	I	J	K	L	M	N	O	Least Inclusive Named Supra-ordinal Clade	Order	Museum or Zoo	Catalog or Collection #	Collection Locality	Collector
1	Acanthisitta chloris	57068	Rifleman	1	1	1					1	1							Psittacopasserae	Passeriformes	MVZ	No voucher	New Zealand	C. Sibley collection (#1023)
2	Bombycilla garrulus	125297	Bohemian Waxwing	1	1	1					1	1							Psittacopasserae	Passeriformes	USNM	621231	Russia (USSR)	A. B. Sokolov
3	Regulus calendula	73321	Ruby-crowned Kinglet	1	1	1					1	1							Psittacopasserae	Passeriformes	USNM	601728	USA	P. R. Windler
4	Sylvia nana	175014	Desert Warbler	1	1	1					1	1							Psittacopasserae	Passeriformes	USNM	586676	Mongolia	B. K. Schmidt
5	Turdus falklandii	175017	Austral Thrush	1	1	1					1	1							Psittacopasserae	Passeriformes	AMNH	10421*	Argentina	P. R. Sweet
6	Fringilla montifringilla	36255	Brambling	1	1	1					1	1							Psittacopasserae	Passeriformes	USNM	586194	Russia (USSR)	C. S. Wood
7	Passer montanus	9160	Eurasian Tree Sparrow	1	1	1					1	1							Psittacopasserae	Passeriformes	FMNH	347952	Pakistan	S. M. Goodman & P. Myers
8	Ploceus cucullatus	135448	Village Weaver	1	1	1					1	1							Psittacopasserae	Passeriformes	FMNH	429881	Democratic Republic of Congo	J. M. Bates
9	Vidua chalybeata	81927	Village Indigobird	1	1	1					1	1							Psittacopasserae	Passeriformes	LSUMNS	39547	Ghana	B. D. Marks
10	Picathartes gymnocephalus	175131	White-necked Rockfowl	1	1	1					1	1							Psittacopasserae	Passeriformes	LSUMNS	18002	Captive	D. C. Moyer
11	Corvus corone	30422	Carrion Crow	1	1	1					1	1							Psittacopasserae	Passeriformes	USNM	621224	Russi	B. K. Schmidt
12	Malurus melanocephalus	175006	Red-backed Fairywren	1	1	1					1	1							Psittacopasserae	Passeriformes	ANWC	29907	Australia	---
13	Climacteris erythrops	254447	Red-browed Treecreeper	1	1	1					1	1							Psittacopasserae	Passeriformes	ANWC	46255	Australia	---
14	Menura novaehollandiae	47692	Superb Lyrebird	1	1	1					1	1							Psittacopasserae	Passeriformes	ANWC	42757	Australia	---
15	Dendrocolaptes certhia	190289	Amazonian Barred-woodcreeper	1	1	1					1	1							Psittacopasserae	Passeriformes	KUMNH	88158	Guyana	M. B. Robbins
16	Scytalopus magellanicus	9169	Magellanic Tapaculo	1	1	1					1	1							Psittacopasserae	Passeriformes	LSUMNS	8346	Peru	---
17	Grallaria varia	117165	Variegated Antpitta	1	1	1					1	1							Psittacopasserae	Passeriformes	USNM	625538	Guyana	M. J. Braun
18	Thamnophilus nigrocinereus	175015	Blackish-grey Antshrike	1	1	1					1	1							Psittacopasserae	Passeriformes	LSUMNS	20234	Brazil	M. Cohn-Haft
19	Mionectes macconnelli	254557	McConnell's Flycatcher	1	1	1					1	1							Psittacopasserae	Passeriformes	USNM	586411	Guyana	R. T. Brumfield
20	Tyrannus tyrannus	43165	Eastern Kingbird	1	1	1					1	1							Psittacopasserae	Passeriformes	USNM	586080	USA	B. K. Schmidt
21	Pipra (Lepidothrix) coronata	321398	Blue-crowned Manakin	1	1	1					1	1							Psittacopasserae	Passeriformes	FMNH	433694	Peru	D. F. Stotz
22	Pitta guajana	265622	Banded Pitta	1	1	1					1	1							Psittacopasserae	Passeriformes	LSUMNS	36368	Malaysia	R. G. Moyle
23	Smithornis rufolateralis	137762	Rufous-sided Broadbill	1	1	1					1	1							Psittacopasserae	Passeriformes	FMNH	429425	Central African Republic	D. E. Willard
24	Sapayoa aenigma	239371	Broad-billed Sapayoa	1	1	1					1	1							Psittacopasserae	Passeriformes	LSUMNS	2333	Panama	S. M. Lanyon
25	Alisterus scapularis	458117	Australian King Parrot	1	1	1					1	1							Psittacopasserae	Psittaciformes	USNM	612684	Australia	A. Hiller
26	Psittacula alexandri	232635	Red-breasted parakeet	1	1	1					1	1							Psittacopasserae	Psittaciformes	LSUMNS	36555	Captive	D. L. Dittmann
27	Micropsitta finschii	57423	Finsch's Pygmy Parrot	1	1	1					1	1							Psittacopasserae	Psittaciformes	USNM	615016	Papua New Guinea	J. P. Angle & B. M. Beehler
28	Chalcopsitta cardinalis	176062	Cardinal Lory	1	1	1					1	1							Psittacopasserae	Psittaciformes	UWBM	76322	Solomon Islands	C. E. Smith
29	Platycercus elegans	269190	Crimson Rosella	1	1	1					1	1							Psittacopasserae	Psittaciformes	USNM	612685	Australia	D. Davidson
30	Psittacus erithacus	57247	African Grey Parrot	1	1	1					1	1							Psittacopasserae	Psittaciformes	FMNH	363153	Tanzania	Birds Haven
31	Cacatua sulphurea	141271	Yellow-crested Cockatoo	1	1	1					1	1							Psittacopasserae	Psittaciformes	USNM	542225	Captive	---
32	Daptrius ater	56348	Black Caracara		1	1					1	1							Eufalconimorphae	Falconiformes	KUMNH	88118	Guyana	C. M. Milensky
33	Falco mexicanus	279964	Prairie Falcon		1	1					1	1							Eufalconimorphae	Falconiformes	MSB	103400	New Mexico, USA	---
34	Herpetotheres cachinnans	56343	Laughing Falcon		1	1					1	1							Eufalconimorphae	Falconiformes	USNM	612262	Panama	---
35	Micrastur semitorquatus	56334	Collared Forest-falcon		1	1					1	1							Eufalconimorphae	Falconiformes	LSUMNS	11298	Peru	D. C. Schmitt
36	Cariama cristata	54380	Red-legged Seriema			1					1	1							Australaves	Cariamiformes	LSUMNS	8656	Captive	---
37	Alcedo leucogaster	325337	White-bellied Kingfisher				1	1	1	1	1	1							Picodynastornithes	Coraciiformes	FMNH	429397	Central African Republic	D. E. Willard
38	Momotus momota	57426	Blue-crowned Motmot				1	1	1	1	1	1							Picodynastornithes	Coraciiformes	USNM	609134	Guyana	M. J. Braun
39	Todus angustirostris	176936	Narrow-billed Tody				1	1	1	1	1	1							Picodynastornithes	Coraciiformes	AMNH	6949*	Dominican Republic	N. K. Klein
40	Brachypteracias squamigera	188337	Scaly Ground-roller				1	1	1	1	1	1							Picodynastornithes	Coraciiformes	FMNH	384758	Madagascar	S. M. Goodman
41	Coracias caudata	56292	Lilac-breasted Roller				1	1	1	1	1	1							Picodynastornithes	Coraciiformes	USNM	621662	Captive	---
42	Merops nubicus	57421	Northern Carmine Bee-eater				1	1	1	1	1	1							Picodynastornithes	Coraciiformes	AMNH	9269*	Captive	P. R. Sweet
43	Bucco macrodactylus	458186	Chestnut-capped Puffbird				1	1	1	1	1	1							Picodynastornithes	Piciformes (Galbulae)	FMNH	433243	Peru	T. Pequeno
44	Galbula albirostris	458192	Yellow-billed Jacamar				1	1	1	1	1	1							Picodynastornithes	Piciformes (Galbulae)	USNM	609136	Guyana	M. J. Braun
45	Capito niger	91789	Black-spotted Barbet				1	1	1	1	1	1							Picodynastornithes	Piciformes (Pici)	KUMNH	88938	Guyana	M. B. Robbins
46	Megalaima virens	219518	Great Barbet				1	1	1	1	1	1							Picodynastornithes	Piciformes (Pici)	LSUMNS	20788	Captive	S. W. Cardiff
47	Indicator maculatus	545262	Spotted Honeyguide				1	1	1	1	1	1							Picodynastornithes	Piciformes (Pici)	FMNH	429419	Central African Republic	D. E. Willard
48	Dryocopus pileatus	51359	Pileated Woodpecker				1	1	1	1	1	1							Picodynastornithes	Piciformes (Pici)	LSUMNS	20929	Louisiana, USA	T. S. Sillett
49	Bucorvus abyssinicus	153643	Abyssinian Ground-hornbill					1	1	1	1	1							Picocoracae	Bucerotiformes	SFZG	201050	Captive (live blood)	San Francisco Zoological Garden
50	Tockus camurus	458195	Red-billed Dwarf Hornbill					1	1	1	1	1							Picocoracae	Bucerotiformes	USNM	616704	Gabon	B. K. Schmidt
51	Phoeniculus purpureus	113189	Green Wood Hoopoe					1	1	1	1	1							Picocoracae	Bucerotiformes	LSUMNS	39521	Ghana	B. D. Marks
52	Upupa epops	57439	Hoopoe					1	1	1	1	1							Picocoracae	Bucerotiformes	USNM	586147	Russia (USSR)	A. Vanushkin
53	Pharomachrus auriceps	59410	Golden-Headed Quetzal						1	1	1	1							Eucavitaves	Trogoniformes	FMNH	433224	Peru	B. J. O'Shea
54	Trogon personatus	57437	Masked Trogon						1	1	1	1							Eucavitaves	Trogoniformes	LSUMNS	7644	Peru	G. H. Rosenberg
55	Leptosomus discolor	188344	Cuckoo Roller (Courol)							1	1	1							Cavitaves	Leptosomiformes	FMNH	434672	Madagascar	T. S. Schulenberg
56	Colius colius	57410	White-backed Mousebird								1	1							Telluraves ("landbirds")	Coliiformes	USNM	622447	Captive	---
57	Urocolius indicus	458196	Red-faced Mousebird								1	1							Telluraves ("landbirds")	Coliiformes	LSUMNS	34225	South Africa	R. G. Moyle
58	Phodilus badius	111818	Oriental Bay Owl								1	1							Telluraves ("landbirds")	Strigiformes	AMNH	10244*	Captive (live blood)	P. R. Sweet
59	Tyto alba	56313	Barn Owl								1	1							Telluraves ("landbirds")	Strigiformes	LSUMNS	19295	Louisiana, USA	J. M. Bates
60	Speotyto (Athene) cunicularia	194338	Burrowing Owl								1	1							Telluraves ("landbirds")	Strigiformes	FMNH	396871	Florida, USA	---
61	Strix occidentalis	201991	Spotted Owl								1	1							Telluraves ("landbirds")	Strigiformes	USNM	608652	USA	R. W. Skaggs
62	Buteo jamaicensis	56263	Red-tailed Hawk								1	1							Telluraves ("landbirds")	Accipitriformes (Accipitres)	LSUMNS	33264	Louisiana, USA	---
63	Gampsonyx swainsonii	56285	Pearl Kite								1	1							Telluraves ("landbirds")	Accipitriformes (Accipitres)	LSUMNS	5174	Peru	S. W. Cardiff
64	Pandion haliaetus	56262	Osprey								1	1							Telluraves ("landbirds")	Accipitriformes (Accipitres)	FMNH	385893	Florida, USA	Archibold Biological Station
65	Sagittarius serpentarius	56258	Secretarybird								1	1							Telluraves ("landbirds")	Accipitriformes (Accipitres)	USNM	621021	Captive	---
66	Cathartes aura	43455	Turkey Vulture								1	1							Telluraves ("landbirds")	Accipitriformes (Cathartidae)	USNM	625337	Guyana	B. K. Schmidt
67	Sarcoramphus papa	43583	King Vulture								1	1							Telluraves ("landbirds")	Accipitriformes (Cathartidae)	USNM	623238	Captive	C. M. Milensky
68	Arenaria interpres	54971	Ruddy Turnstone									1							Litoritelluraves	Charadriiformes	USNM	607650	Panama	T. J. Parsons
69	Jacana jacana	54508	Wattled Jacana									1							Litoritelluraves	Charadriiformes	LSUMNS	7288	Peru	T. C. Maxwell
70	Rostratula benghalensis	118793	Greater Painted Snipe									1							Litoritelluraves	Charadriiformes	FMNH	358283	Philippines	T. P. Gnoske
71	Pedionomus torquatus	227192	Plains-wanderer									1							Litoritelluraves	Charadriiformes	ANWC	44673	Australia	---
72	Thinocorus orbignyianus	161742	Grey-breasted Seedsnipe									1							Litoritelluraves	Charadriiformes	USNM	616270	Argentina	B. K. Schmidt
73	Dromas ardeola	458190	Crab Plover									1							Litoritelluraves	Charadriiformes	MVZ	No voucher	---	C. Sibley collection (#799)
74	Larus marinus	8912	Great Black-backed Gull									1							Litoritelluraves	Charadriiformes	FMNH	385745	Florida, USA	---
75	Turnix sylvatica	9248	Kurrichane Buttonquail									1							Litoritelluraves	Charadriiformes	AMNH	5860*	Republic of South Africa	J. G. Groth
76	Burhinus bistriatus	240201	Double-striped Thick-knee									1							Litoritelluraves	Charadriiformes	FMNH	389169	Brazil	D. F. Stotz
77	Charadrius vociferus	50402	Killdeer									1							Litoritelluraves	Charadriiformes	FMNH	430574	Wisconsin, USA	Bay Beach Wildlife Sanctuary
78	Phegornis mitchellii	227179	Diademed Sandpiper-plover									1							Litoritelluraves	Charadriiformes	LSUMNS	103926	Peru	T. S. Schulenberg
79	Haematopus palliatus	279960	American Oystercatcher									1							Litoritelluraves	Charadriiformes	LSUMNS	163409?	---	---
80	Anhinga anhinga	56067	Anhinga											1	1				Aequornithes ("waterbirds")	Suliformes	USNM	622528	Florida, USA	M. E. Kennedy
81	Phalacrocorax carbo	9209	Great Cormorant											1	1				Aequornithes ("waterbirds")	Suliformes	LSUMNS	45740	Kuwait	J. M. Bishop
82	Morus bassanus	37578	Northern Gannet											1	1				Aequornithes ("waterbirds")	Suliformes	LSUMNS	23898	Louisiana, USA	D. L. Dittmann
83	Fregata magnificens	37042	Magnificent Frigatebird											1	1				Aequornithes ("waterbirds")	Suliformes	USNM	613348	Panama	S. L. Olson
84	Ardea herodias	56072	Great Blue Heron											1	1				Aequornithes ("waterbirds")	Pelecaniformes	FMNH	385673	Florida, USA	---
85	Cochlearius cochlearius	110676	Boat-billed Heron											1	1				Aequornithes ("waterbirds")	Pelecaniformes	USNM	621016	Captive	---
86	Eudocimus albus	371913	American White Ibis											1	1				Aequornithes ("waterbirds")	Pelecaniformes	FMNH	387623	Florida, USA	---
87	Balaeniceps rex	33584	Shoebill											1	1				Aequornithes ("waterbirds")	Pelecaniformes	LSUMNS	13372	Captive	---
88	Scopus umbretta	33581	Hamerkop											1	1				Aequornithes ("waterbirds")	Pelecaniformes	LSUMNS	28330	Captive	D. L. Dittmann
89	Pelecanus occidentalis	37043	Brown Pelican											1	1				Aequornithes ("waterbirds")	Pelecaniformes	USNM	621489	USA	---
90	Ciconia ciconia	8928	White Stork											1	1				Aequornithes ("waterbirds")	Ciconiiformes	KUMNH	90088	---	---
91	Eudyptula minor	37083	Little Penguin										1	1	1				Austrodyptornithes	Sphenisciformes	MV	I224	Australia	-
92	Oceanites oceanicus	79653	Wilson's Storm-petrel										1	1	1				Austrodyptornithes	Procellariiformes	LSUMNS	37197	Louisiana, USA	D. L. Dittmann
93	Puffinus griseus	37052	Sooty Shearwater										1	1	1				Austrodyptornithes	Procellariiformes	USNM	613236	Pacific Ocean	L. Spear
94	Pelecanoides urinatrix	37079	Common Diving-Petrel										1	1	1				Austrodyptornithes	Procellariiformes	AMNH	2583*	New Zealand	---
95	Oceanodroma tethys	79633	Wedge-rumped Storm-petrel										1	1	1				Austrodyptornithes	Procellariiformes	USNM	613258	Pacific Ocean	L. Spear
96	Gavia immer	37039	Common Loon											1	1				Aequornithes ("waterbirds")	Gaviiformes	FMNH	363266	Minnesota, USA	Minnesota DNR
96	Diomedea (Phoebastria) nigripes	54021	Black-footed Albatross											1	1				Aequornithes ("waterbirds")	Procellariiformes	USNM	622480	USA	B. Callahan
97	Corythaeola cristata	103954	Great Blue Turaco												1				Insolitaves	Musophagiformes	FMNH	357942	Brundi	P. K. Austin & J. C. Kerbis
98	Tauraco erythrolophus	121530	Red-crested Turaco												1				Insolitaves	Musophagiformes	LSUMNS	5354	Captive	D. L. Dittmann
99	Aramus guarauna	54356	Limpkin												1				Insolitaves	Gruiformes	FMNH	385742	Florida, USA	---
100	Grus canadensis	40820	Sandhill Crane												1				Insolitaves	Gruiformes	USNM	621384	Captive	---
102	Psophia crepitans	54359	Grey-winged Trumpeter												1				Insolitaves	Gruiformes	USNM	621709	Guyana	M. J. Braun
103	Heliornis fulica	54369	Sungrebe (American Finfoot)												1				Insolitaves	Gruiformes	FMNH	391998	Brazil	J. Haffer
104	Sarothrura elegans	156766	Buff-spotted Flufftail												1				Insolitaves	Gruiformes	FMNH	346189	Burundi	J. C. Kerbis & A. J. Fisher
105	Himantornis haematopus	458194	Nkulengu Rail												1				Insolitaves	Gruiformes	ZMUC	No voucher	Ghana	L. Holbech & J. Fjeldsa
106	Rallus limicola	156759	Virginia Rail												1				Insolitaves	Gruiformes	FMNH	380034	Illinois, USA	D. E. Willard
107	Centropus viridis	121388	Philippine Coucal												1				Insolitaves	Cuculiformes	USNM	607313	Philippines	C. A. Ross & R. W. Dickerman
108	Coua cristata	121393	Crested Coua												1				Insolitaves	Cuculiformes	FMNH	352800	Madagasca	S. M. Goodman
109	Coccyzus americanus	33603	Yellow-billed Cuckoo												1				Insolitaves	Cuculiformes	USNM	626461	Florida, USA	C. A. Gebhard
110	Phaenicophaeus curvirostris	33595	Chestnut-breasted Malkoha												1				Insolitaves	Cuculiformes	LSUMNS	47001	Malaysia	R. G. Moyle
111	Cuculus canorus	55661	Common Cuckoo												1				Insolitaves	Cuculiformes	USNM	621533	Mongolia	D. A. Banin
112	Crotophaga sulcirostris	33598	Groove-billed Ani												1				Insolitaves	Cuculiformes	USNM	607659	Panama	C. Smith
113	Geococcyx californianus	8947	Greater Roadrunner												1				Insolitaves	Cuculiformes	USNM	621303	USA	P. S. Crossin
114	Choriotis (Ardeotis) kori	89386	Kori Bustard												1				Insolitaves	Otidiformes	FMNH	380020	Tanzania	Northland Wildlife
115	Eupodotis ruficrista	458191	Red-crested Bustard												1				Insolitaves	Otidiformes	MBM	8090	South Africa	J. Klicka
116	Opisthocomus hoazin	30419	Hoatzin																Neoaves	Opisthocomiformes	LSUMNS	9660	Bolivia	D. C. Schmitt
117	Phaethornis griseogularis	382311	Grey-chinned Hermit													1			Strisores (Daedalornithes)	Apodiformes	LSUMNS	39763	Peru	J. P. O'Neill
118	Colibri coruscans	214663	Sparkling Violetear													1			Strisores (Daedalornithes)	Apodiformes	LSUMNS	5574	Peru	T. J. Davis
119	Hemiprocne mystacea	46510	Moustached Treeswift													1			Strisores (Daedalornithes)	Apodiformes	UWBM	68087	Solomon Islands	L. K. Wang
120	Streptoprocne zonaris	46505	White-collared Swift													1			Strisores (Daedalornithes)	Apodiformes	USNM	626065	Guyana	C. M. Milensky
121	Aerodramus vanikorensis	243317	Uniform Swiftlet													1			Strisores (Daedalornithes)	Apodiformes	USNM	608672	Papua New Guinea	J. P. Angle & B. M.
122	Aegotheles (Euaegotheles) insignis	671282	Feline Owlet-nightjar													1			Strisores (Daedalornithes)	Aegotheliformes	KUMNH	95997	Papua New Guinea	---
123	Caprimulgus longirostris	48285	Band-winged Nightjar													1			Strisores	Caprimulgiformes	LSUMNS	32361	Peru	D. G. Christian
124	Eurostopodus macrotis	135169	Great Eared-nightjar													1			Strisores	Caprimulgiformes	USNM	607328	Philippines	R. W. Dickerman et al.
125	Batrachostomus septimus	382305	Philippine Frogmouth													1			Strisores	Podargiformes	FMNH	429205	Philippines	---
126	Podargus strigoides	8905	Tawny Frogmouth													1			Strisores	Podargiformes	USNM	612702	Australia	F. Smith & T. Smith
127	Steatornis caripensis	48435	Oilbird													1			Strisores	Steatornithiformes	LSUMNS	32579	Peru	C. C. Witt
128	Nyctibius grandis	48427	Great Potoo													1			Strisores	Nyctibiiformes	LSUMNS	15415	Bolivia	J. M. Bates
129	Nyctibius bracteatus	48426	Rufous Potoo													1			Strisores	Nyctibiiformes	LSUMNS	4509	Peru	S. W. Cardiff
130	Eurypyga helias	54383	Sunbittern																Neoaves	Eurypygiformes	USNM	586303	Guyana	M. J. Braun
131	Rhynochetos jubatus	54386	Kagu																Neoaves	Eurypygiformes	FLMNH	42714	Captive	---
132	Columba livia	8932	Rock Dove (Pigeon)																Neoaves	Columbiformes	FMNH	428785	Wisconsin, USA	Bay Beach Wildlife Sanctuary
133	Geotrygon montana	115651	Ruddy Quail-Dove																Neoaves	Columbiformes	KUMNH	88129	Guyana	N. Rice
134	Treron vernans	115702	Pink-necked Green-pigeon																Neoaves	Columbiformes	LSUMNS	47229	Malaysia	F. H. Sheldon
135	Columbina passerina	111974	Common Ground Dove																Neoaves	Columbiformes	USNM	626037	Guyana	C. M. Milensky
136	Otidiphaps nobilis	187130	Pheasant Pigeon																Neoaves	Columbiformes	USNM	621030	Captive	---
137	Mesitornis unicolor	54374	Brown Mesite																Neoaves	Mesitornithidae	FMNH	345610	Madagascar	S. M. Goodman
138	Monias benschi	399593	Subdesert Mesite																Neoaves	Mesitornithidae	FMNH	438526	Madagascar	M. J. Raherilalao
139	Pterocles namaqua	216825	Namaqua Sandgrouse																Neoaves	Pteroclidiformes	---	No voucher	Republic of South Africa	---
140	Syrrhaptes paradoxus	302527	Pallas's Sandgrouse																Neoaves	Pteroclidiformes	USNM	586725	Mongolia	B. Shagdarsuren
141	Phaethon lepturus	97097	White-tailed Tropicbird																Neoaves	Phaethontiformes	LSUMNS	35134	USA	D. L. Dittmann
142	Phaethon rubricauda	57073	Red-tailed Tropicbird																Neoaves	Phaethontiformes	FMNH	346042	Micronesia	S. M. Lanyon
143	Phoenicopterus chilensis	117000	Chilean Flamingo																Neoaves (Mirandornithes)	Phoenicopteriformes	USNM	614545	Argentina	J. P. Angle
144	Podiceps auritus	37050	Horned Grebe																Neoaves (Mirandornithes)	Podicipediformes	LSUMNS	19296	Florida, USA	A. Chapman-Kofron
145	Alectura lathami	81907	Australian Brush-turkey																Galloanserae	Galliformes	USNM	612658	Australia	V. Davies
146	Megapodius eremita	81904	Melanesian Megapode																Galloanserae	Galliformes	MV	KNG16	Australia	---
147	Colinus cristatus	114915	Crested Bobwhite																Galloanserae	Galliformes	USNM	626183	---	---
148	Coturnix coturnix	9091	Common Quail																Galloanserae	Galliformes	USNM	621265	United Kingdom	T. West
149	Gallus gallus	9031	Red Junglefowl (Chicken)																Galloanserae	Galliformes	LSUMNS	19436	Captive	D. L. Dittmann
150	Rollulus rouloul	30405	Crested Wood-partridge																Galloanserae	Galliformes	LSUMNS	24971	Captive	D. L. Dittmann
151	Numida meleagris	8996	Helmeted Guineafowl																Galloanserae	Galliformes	FMNH	384667	Madagascar	S. M. Goodman
152	Crax alector	84985	Black Curassow																Galloanserae	Galliformes	USNM	625104	Guyana	C. M. Milensky
153	Anas platyrhynchos	8839	Mallard																Galloanserae	Anseriformes	FMNH	398624	Illinois, USA	T. Valentino
154	Aythya americana	30385	Redhead																Galloanserae	Anseriformes	LSUMNS	2651	USA	D. L. Dittman
155	Biziura lobata	45648	Musk Duck																Galloanserae	Anseriformes	ANWC	50099	Australia	---
156	Anser erythropus	132586	Lesser White-fronted Goose																Galloanserae	Anseriformes	LSUMNS	19457	Captive	---
157	Malacorhynchus membranaceus	45646	Pink-eared Duck																Galloanserae	Anseriformes	LSUMNS	29875	Captive	D. L. Dittmann
158	Oxyura jamaicensis	8884	Ruddy Duck																Galloanserae	Anseriformes	FMNH	397634	Wisconsin, USA	Bay Beach Wildlife Sanctuary
159	Anseranas semipalmata	8851	Magpie Goose																Galloanserae	Anseriformes	USNM	621019	Captive	---
160	Chauna torquata	30388	Southern Screamer																Galloanserae	Anseriformes	USNM	614546	Argentina	J. P. Angle
161	Apteryx australis	8822	Southern Brown Kiwi														1	1	Novaeratitae	Apterygiformes	LSUMNS	8606	Captive	---
162	Casuarius casuarius	8787	Southern Cassowary														1	1	Novaeratitae	Casuariiformes	LSUMNS	10202	Captive	P. P. Marra
163	Dromaius novaehollandiae	8790	Emu														1	1	Novaeratitae	Casuariiformes	LSUMNS	5895	Captive	S. M. Lanyon
164	Crypturellus soui	458187	Little Tinamou															1	Notopalaeognathae	Tinamiformes	USNM	586295	Guyana	K. S. Bostwick
165	Tinamus guttatus	94827	White-throated Tinamou															1	Notopalaeognathae	Tinamiformes	FMNH	389673	Brazil	B. D. Patterson
166	Eudromia elegans	8805	Elegant Crested Tinamou															1	Notopalaeognathae	Tinamiformes	LSUMNS	5893	Captive	D. L. Dittmann
167	Nothoprocta perdicaria	30464	Chilean Tinamou															1	Notopalaeognathae	Tinamiformes	LSUMNS	23841	Captive	D. L. Dittmann
168	Rhea americana	8797	Greater Rhea															1	Notopalaeognathae	Rheiformes	USNM	541231	Captive	---
169	Struthio camelus	8801	Ostrich																Palaeognathae	Struthioniformes	LSUMNS	1526	Captive	D. L. Dittmann
